# Supplementary material
Source: PubMed Central journal article supplement (PMC3033718)
Supplement: supp_110.175356_JPET175356_supplemental_data.pdf [file supp_110.175356_JPET175356_supplemental_data.pdf]

## Supplemental data

Manuscript title: 3D-QSAR studies on UGT1A9-mediated 3-O-glucuronidation of natural flavonols using a Pharmacophore based CoMFA model

Authors: Baojian Wu, John Kenneth Morrow, Rashim Singh, Shuxing Zhang and Ming Hu

Journal name: Journal of Pharmacology and Experimental Therapeutics

Table S1. The conversion factors (K) are showed at detecting wavelengths for flavonol 3-O-glucuronides.

| Compd | Name                                           | K           | $\lambda$ , nm |
|-------|------------------------------------------------|-------------|----------------|
| 1     | 3,2'-dihydroxyflavone                          | 1.27 ± 0.08 | 310            |
| 2     | 3,3',4'-trihydroxyflavone                      | 0.91 ± 0.05 | 345            |
| 3     | 3,4'-dihydroxyflavone                          | 1.02 ± 0.03 | 254            |
| 4     | 3,6,4'-trihydroxyflavone                       | 1.15 ± 0.10 | 254            |
| 5     | 3,6-dihydroxyflavone                           | 1.22 ± 0.18 | 315            |
| 6     | 3,7-dihydroxyflavone                           | 1.29 ± 0.03 | 254            |
| 7     | 3-hydroxy-2'-methoxyflavone                    | 1.25 ± 0.11 | 320            |
| 8     | 3-hydroxy-3'-methoxyflavone                    | 1.08 ± 0.09 | 320            |
| 9     | 3-hydroxy-4'-methoxyflavone                    | 0.87 ± 0.10 | 254            |
| 10    | 3-hydroxy-5,7-dimethoxyflavone                 | 1.05 ± 0.13 | 254            |
| 11    | 3-hydroxy-5-methoxyflavone                     | 0.92 ± 0.23 | 254            |
| 12    | 3-hydroxy-6,4'-dimethoxyflavone                | 1.20 ± 0.44 | 254            |
| 13    | 3-hydroxy-6-methoxyflavone                     | 1.05 ± 0.06 | 254            |
| 14    | 3-hydroxy-7-methoxyflavone                     | 0.82 ± 0.19 | 254            |
| 15    | 3-hydroxyflavone                               | 0.96 ± 0.06 | 254            |
| 16    | 3-hydroxy-6-methyl-3',4'-methylenedioxyflavone | 1.06 ± 0.14 | 360            |
| 17    | Isorhamnetin                                   | 1.28 ± 0.24 | 354            |
| 18    | Kaempferol                                     | 1.00 ± 0.06 | 354            |
| 19    | Morin                                          | 0.91 ± 0.08 | 360            |
| 20    | Myricetin                                      | 1.16 ± 0.04 | 370            |
| 21    | Quercetin                                      | 1.13 ± 0.16 | 360            |
| 22    | Resokaempferol                                 | 1.10 ± 0.24 | 354            |
| 23    | Rhamnetin                                      | 1.08 ± 0.16 | 370            |
| 24    | 3,3'-dihydroxyflavone                          | 0.90 ± 0.05 | 320            |
| 25    | 3,5-dihydroxyflavone                           | 1.38 ± 0.03 | 263            |
| 26    | 3-hydroxy-2',3'-dimethoxyflavone               | 1.18 ± 0.15 | 320            |
| 27    | 3-hydroxy-6-methylflavone                      | 0.93 ± 0.03 | 310            |
| 28    | 3-hydroxy-7,4'-dimethoxyflavone                | 0.91 ± 0.13 | 254            |
| 29    | Fisetin                                        | 1.14 ± 0.07 | 360            |
| 30    | Galangin                                       | 0.71 ± 0.15 | 354            |

Figure S1. Characterization on the recombinant UGT1A9 using the probe substrate “propofol”. Panel A: kinetics profile of UGT1A9-mediated glucuronidation with propofol. The kinetics curve was well described by Michaelis-Menten equation with  $K_m = 25.8 \pm 4.47 \mu\text{M}$  and  $V_{\text{max}} = 148 \pm 7.03 \text{ pmol/mg/min}$ . Panel B: the UPLC chromatogram at 273 nm (left) and UV spectra (right) of propofol and its glucuronide. The UPLC sample was generated by incubating propofol at  $100 \mu\text{M}$  with UGT1A9 Supersomes ( $26.5 \mu\text{g/ml}$ ) for 60 mins.

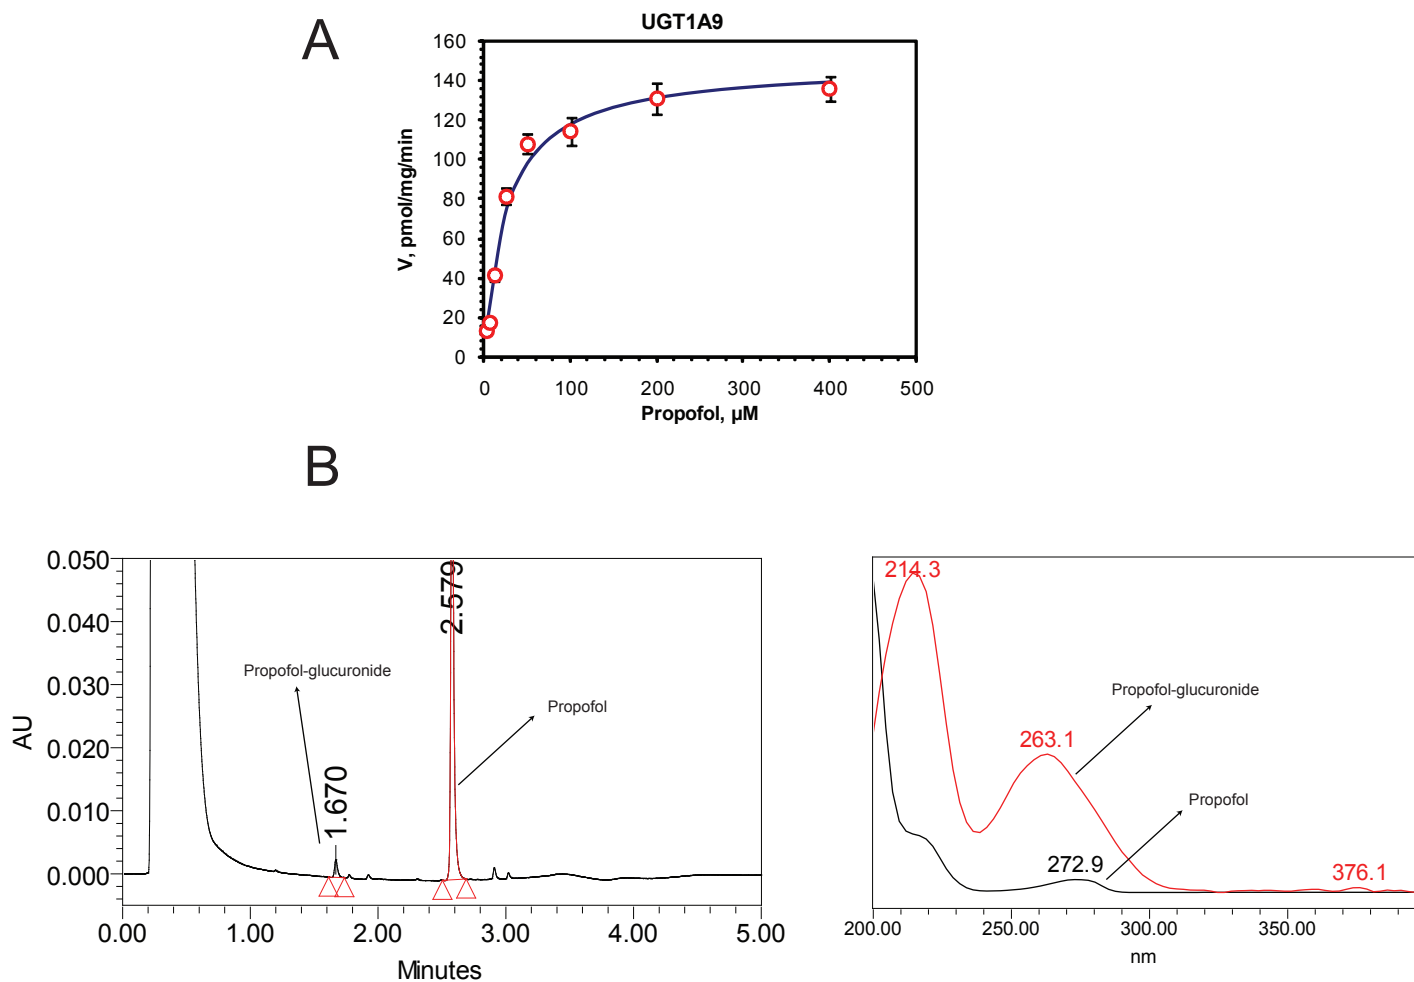

Figure S2. The UPLC chromatograms (left panel) and UV spectra (right panel) of multi-hydroxyl flavonols and their 3-O-glucuronides. The samples were generated by incubating the flavonols at 10  $\mu$ M with UGT1A9 (26.5  $\mu$ g/ml) for 60 mins. Comparing to the parent compounds, band I of 3-O-glucuronides either disappeared or had large hypsochromic shifts (to shorter wavelengths) (i.e., 14.9~26.7 nm).

Figure S2.1. compound 1 (3,2'-dihydroxyflavone)

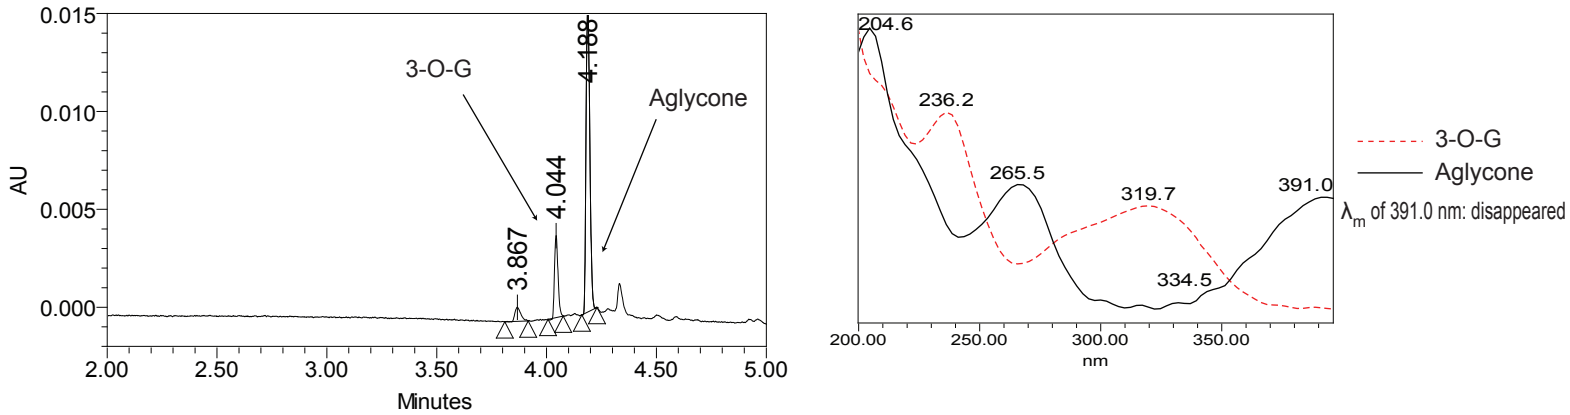

Figure S2.2. compound 2 (3,3',4'-trihydroxyflavone)

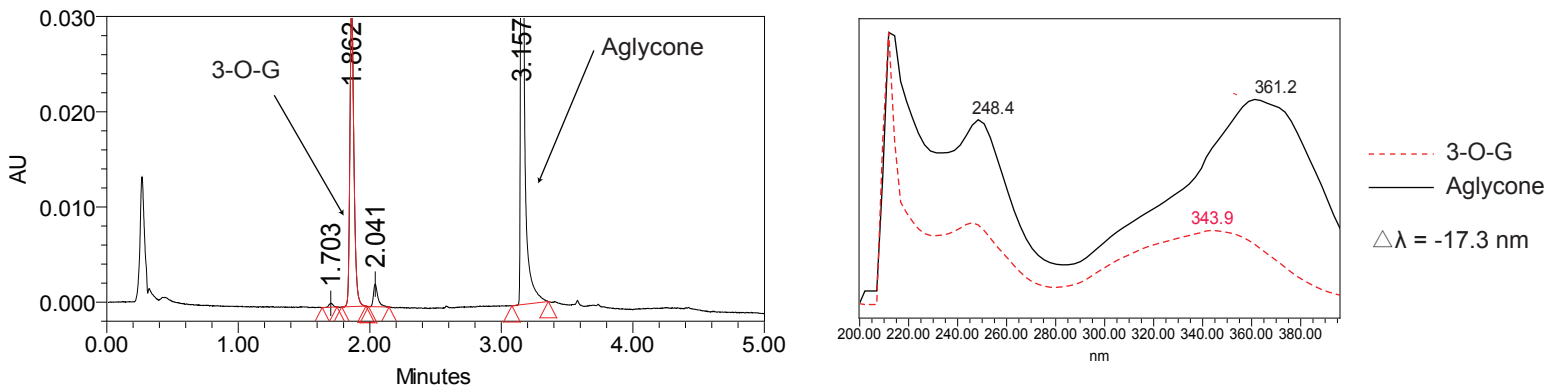

Figure S2.3. compound 3 (3,4'-dihydroxyflavone)

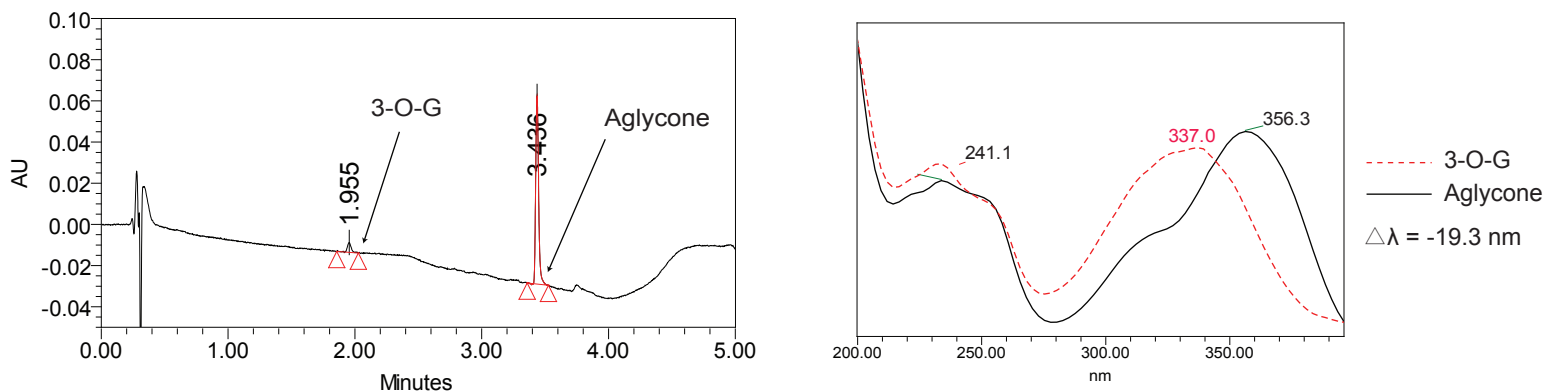

Figure S2.4. compound 4 (3,6,4'-trihydroxyflavone)

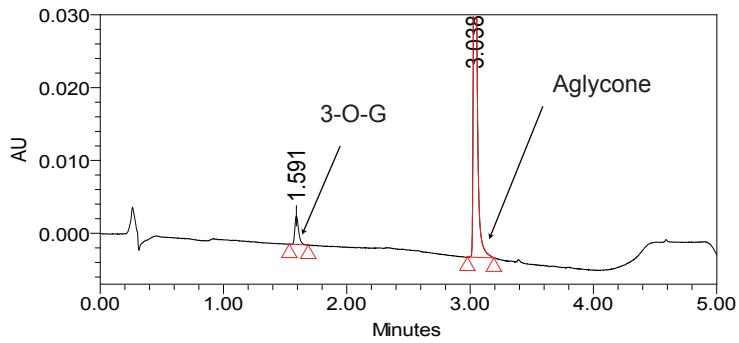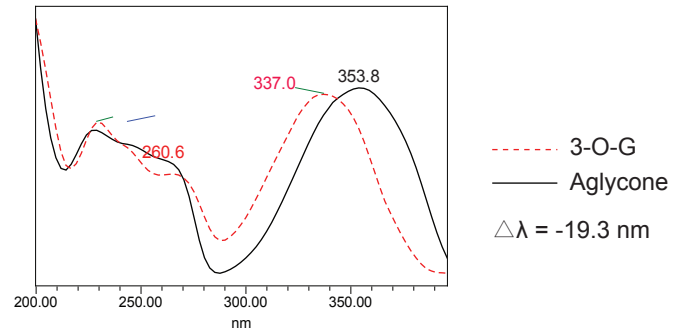

Figure S2.5. compound 5 (3,6-dihydroxyflavone)

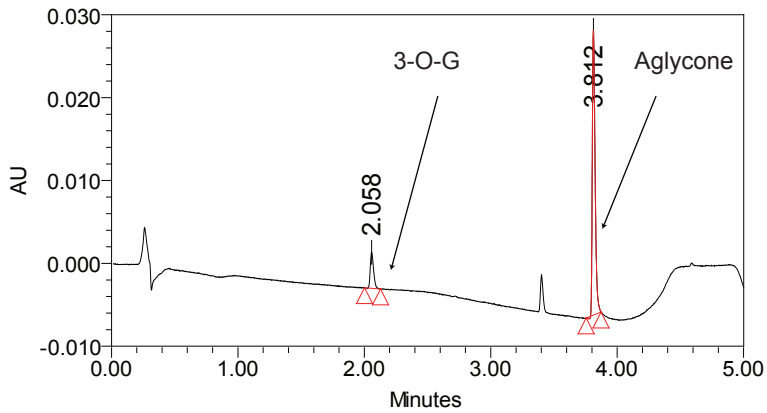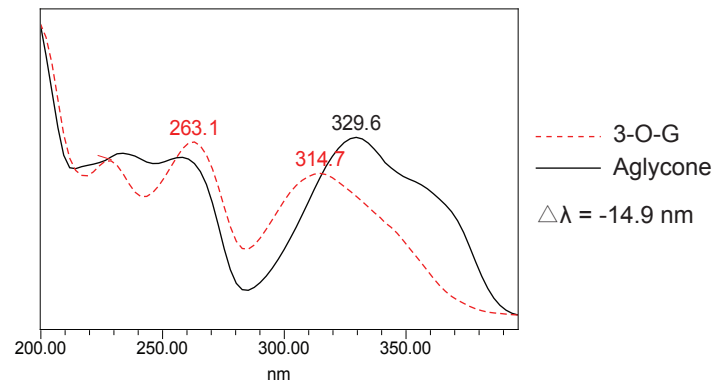

Figure S2.6. compound 6 (3,7-dihydroxyflavone)

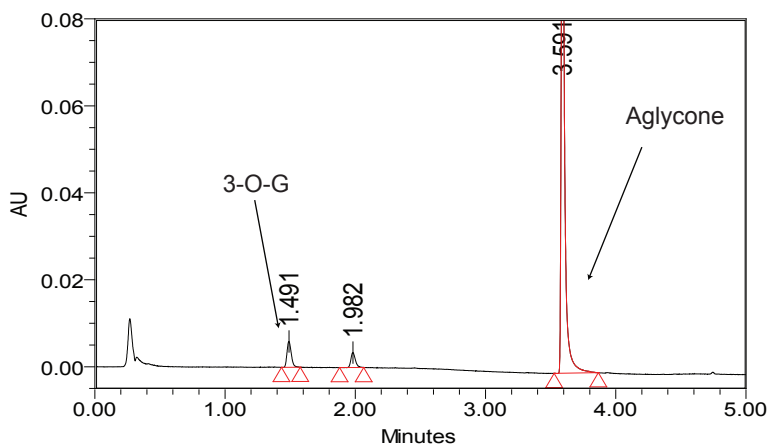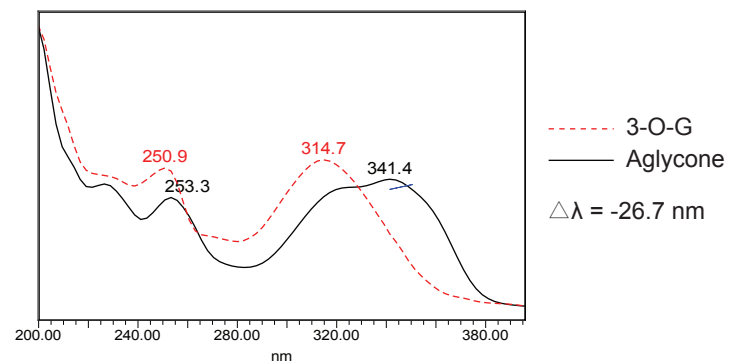

Figure S2.7. compound 17 (isorhamnetin)

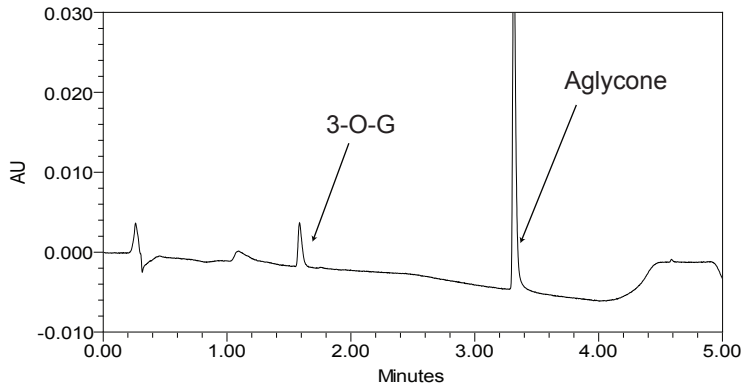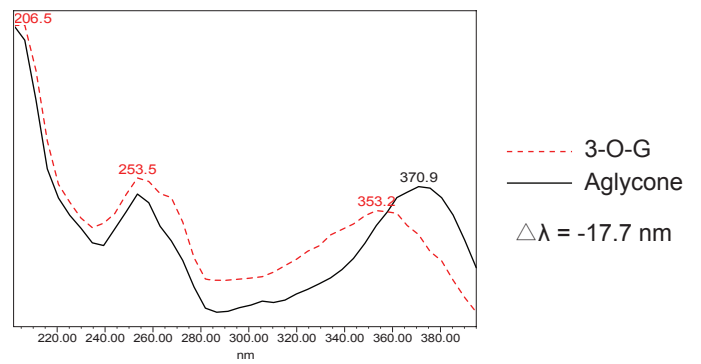

Figure S2.8. compound 18 (kaempferol)

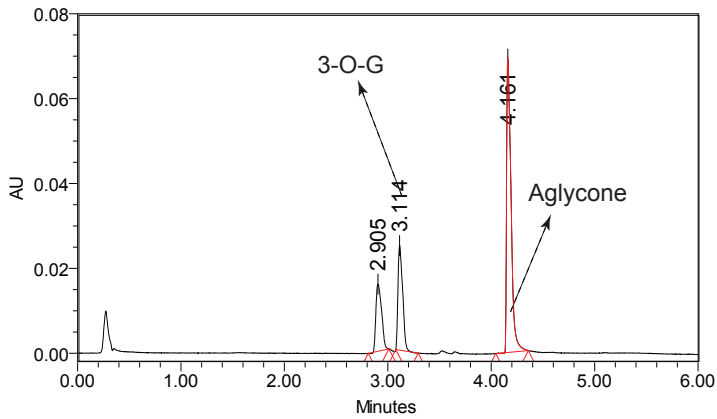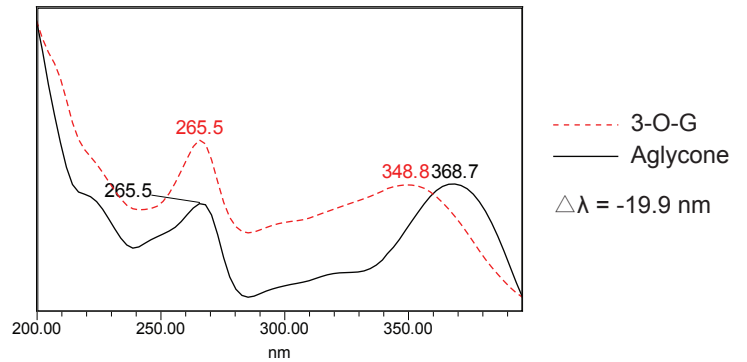

Figure S2.9. compound 19 (morin)

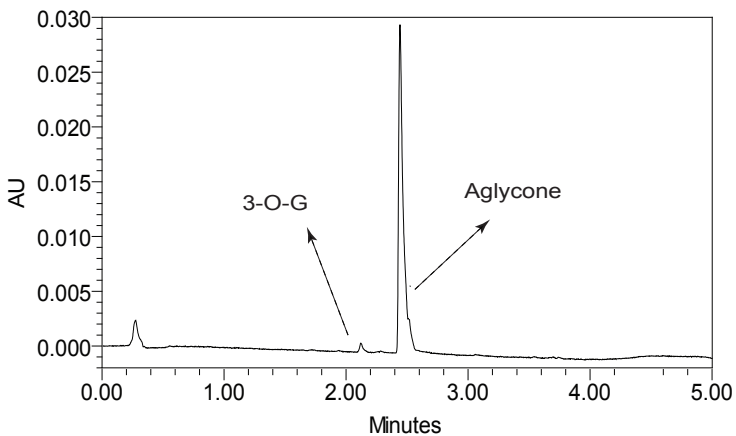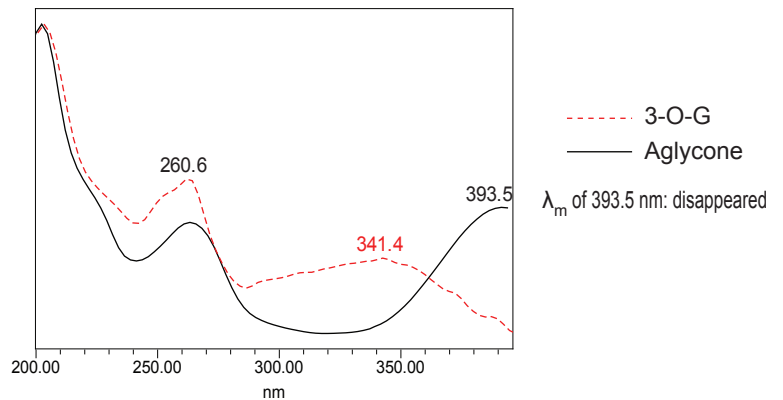

Figure S2.10. compound 20 (Myricetin)

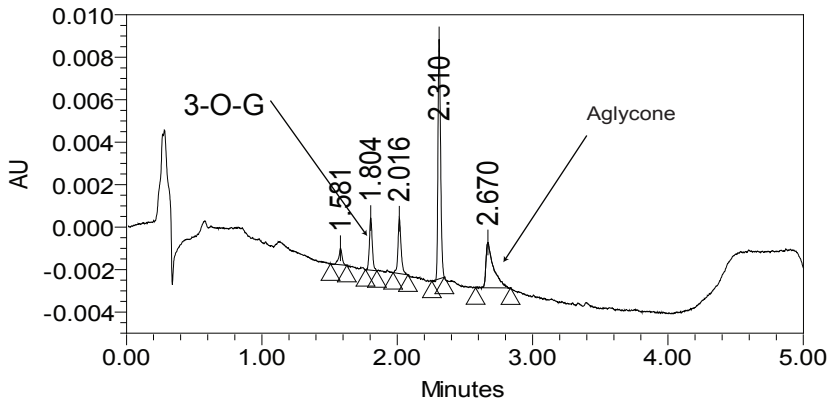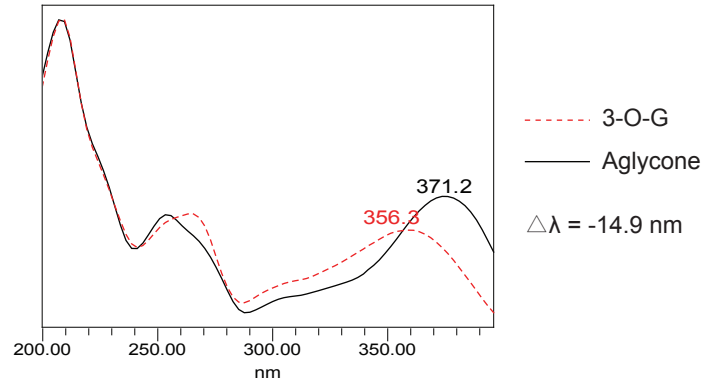

Figure S2.11. compound 21 (Quercetin)

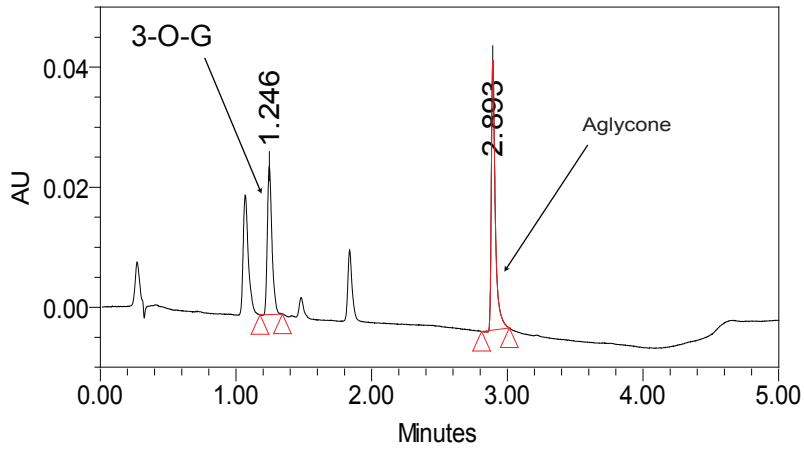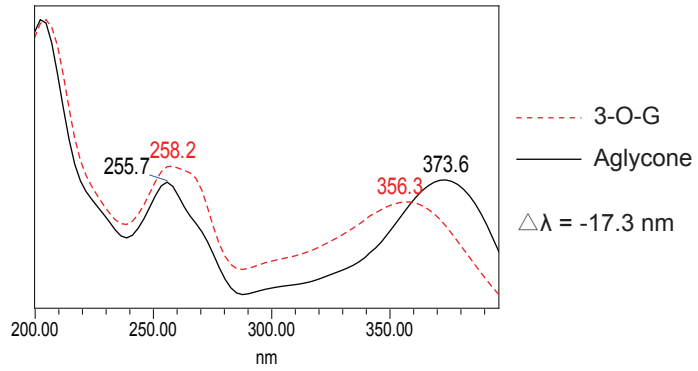

Figure S2.12. compound 22 (resokaempferol)

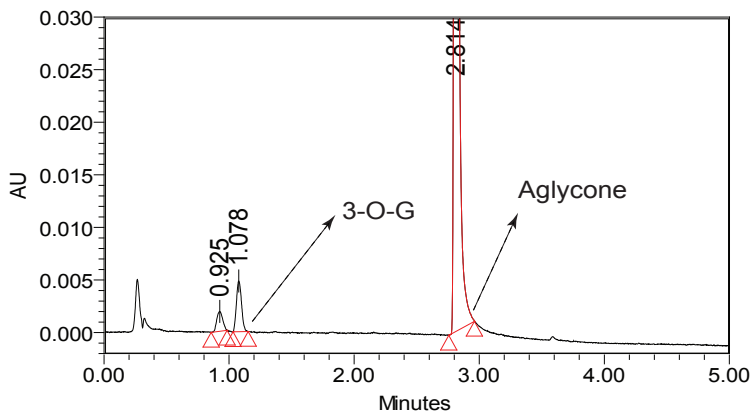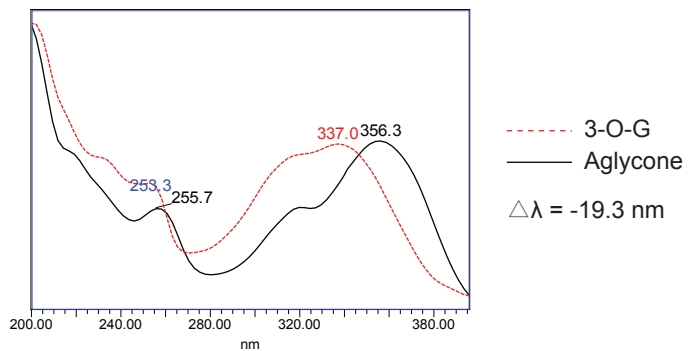

Figure S2.13. compound 23 (rhamnetin)

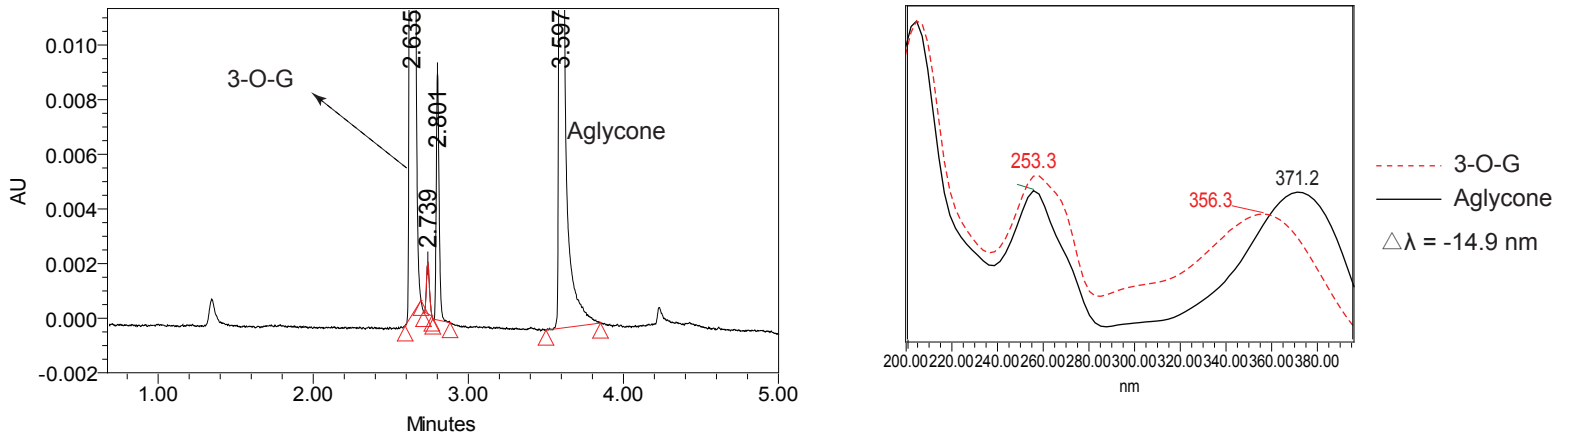

Figure S2.14. compound 24 (3,3'-dihydroxyflavone)

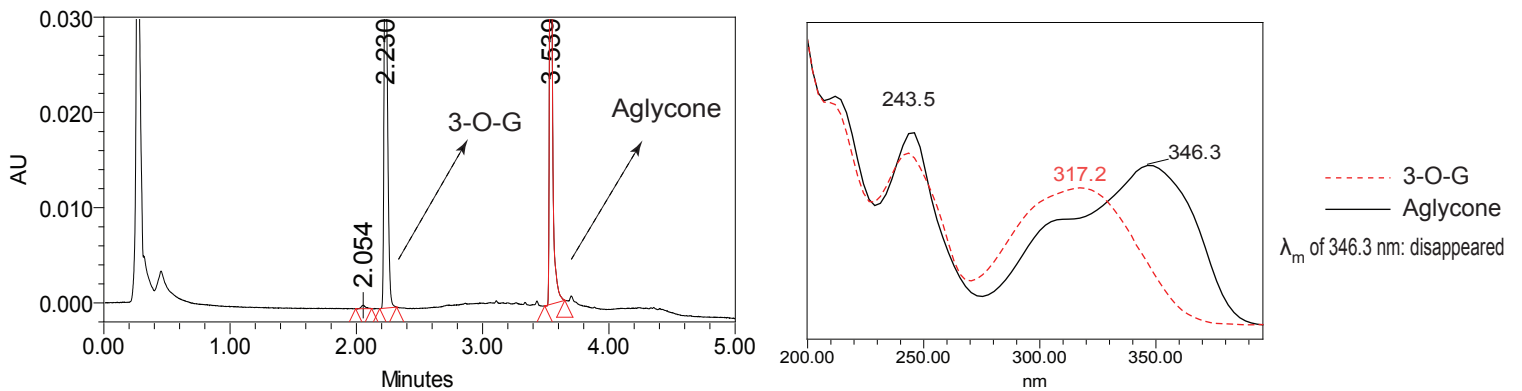

Figure S2.15. compound 25 (3,5-dihydroxyflavone)

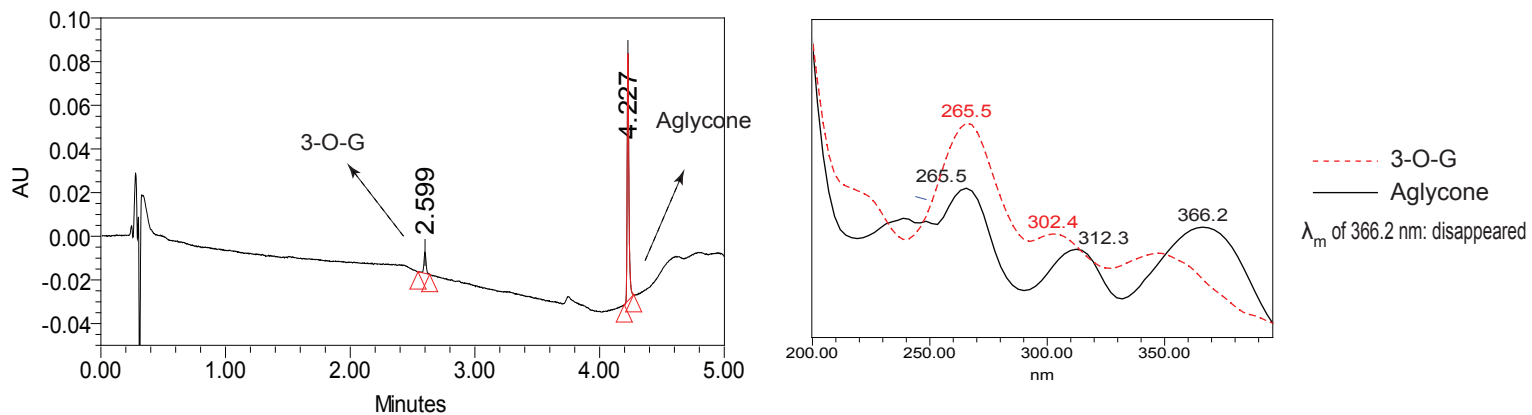

Figure S2.16. compound 29 (Fisetin)

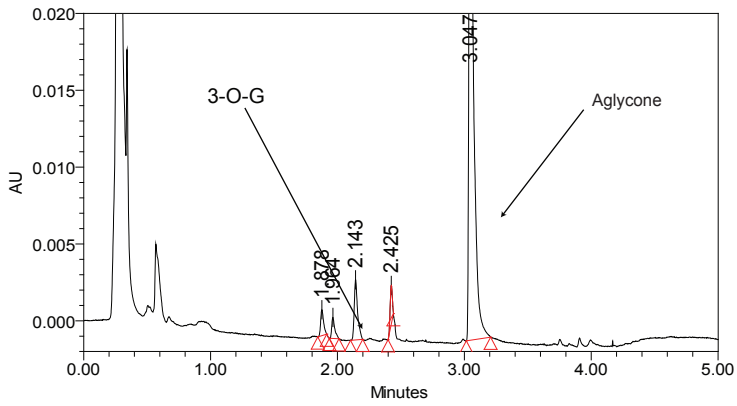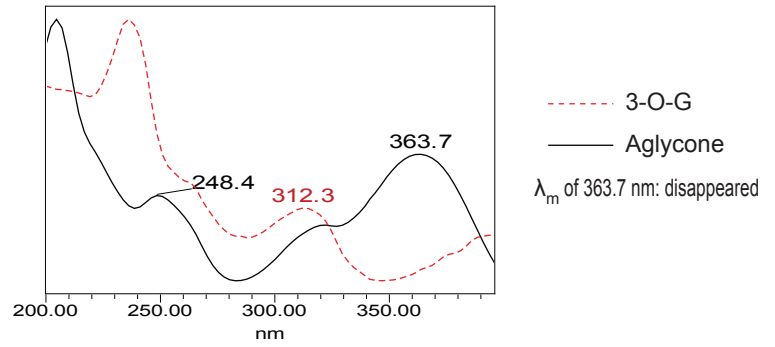

Figure S2.17. compound 30 (galangin)

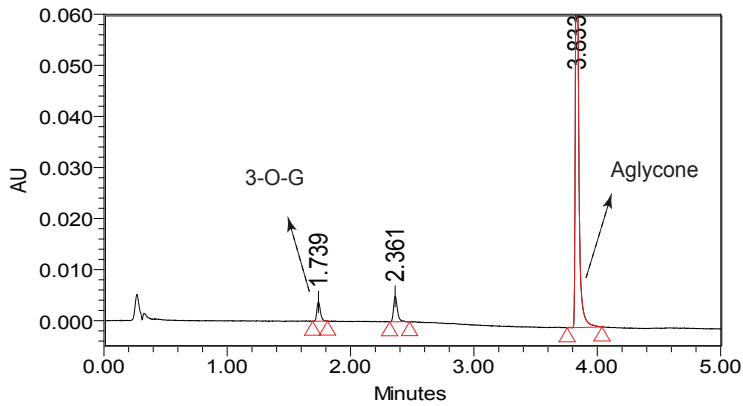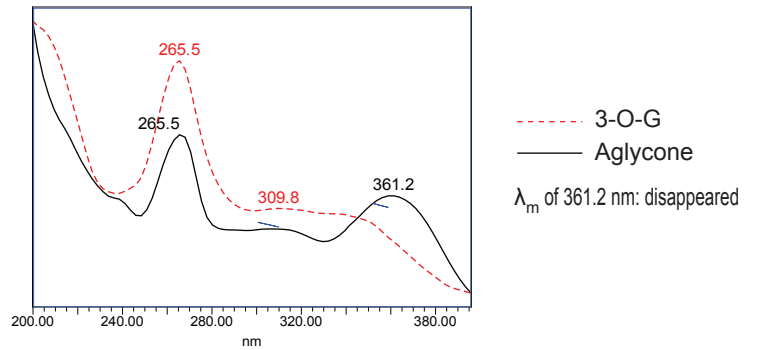



Figure.S3 Kinetics profiles of UGT1A9 with 26 flavonols (3-O-glucuronidation alone).  $K_m$  and  $V_{max}$  or  $K_s$  values were derived by fitting the data to Michaelis-Menten or substrate inhibition equations (Luukkanen et al., 2005). The kinetics profiles of additional 4 flavonols (#6, 37DHF; #18, 3574'QHF; #22, 374'THF; #30, 357THF) were summarized somewhere else (Wu and Hu, in preparation). The graphs are ordered by compound number (#) that corresponds the flavonols numbering in Table 1 or Table 2.

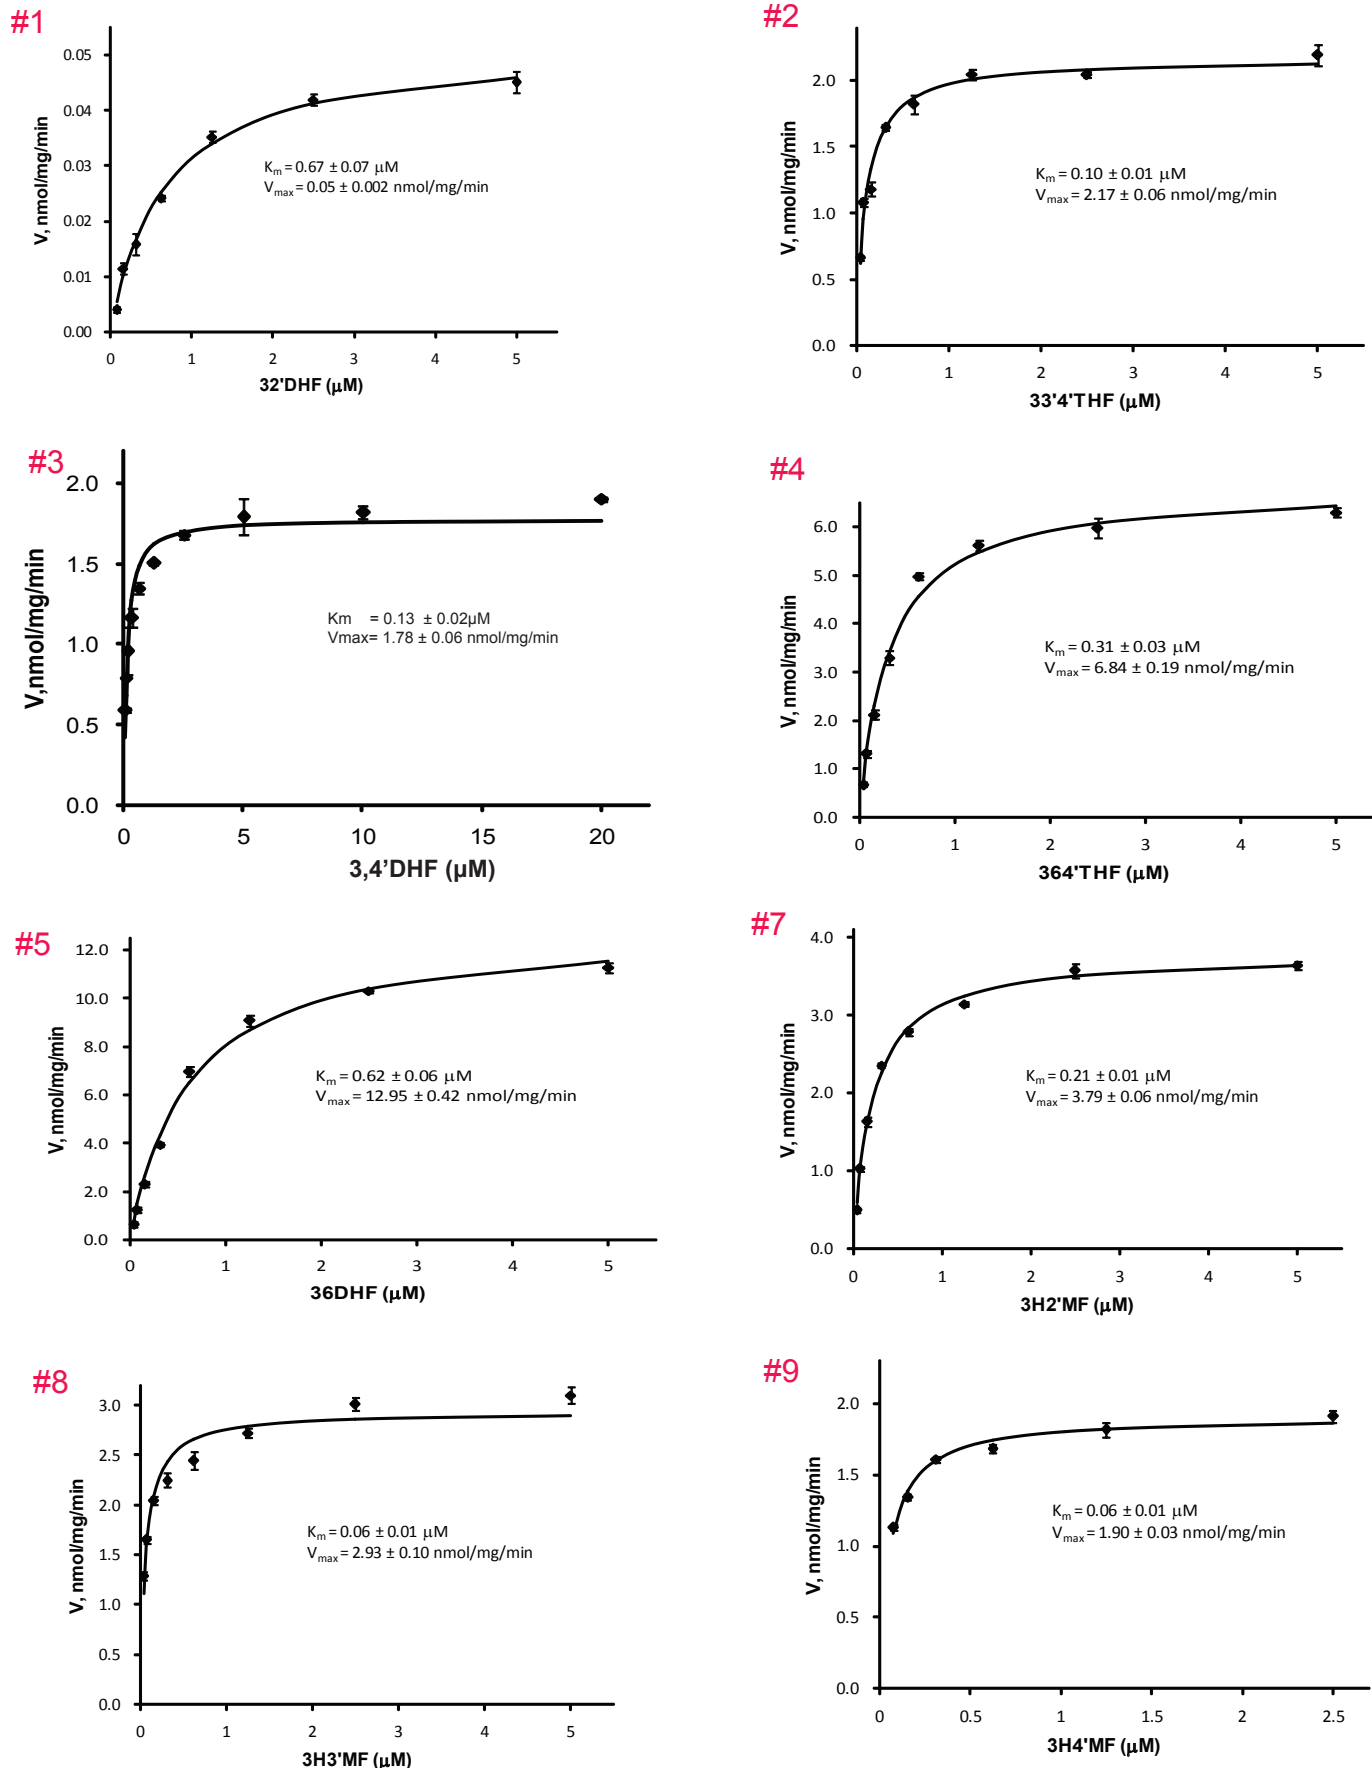

#10

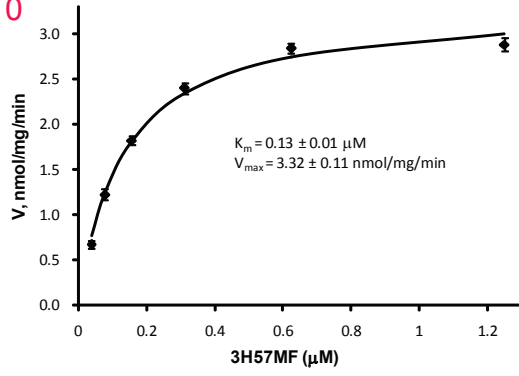

#11

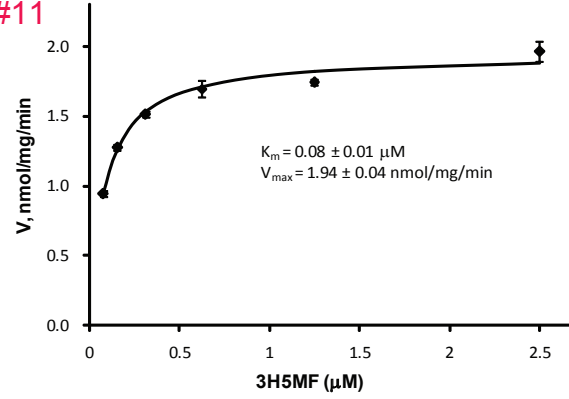

#12

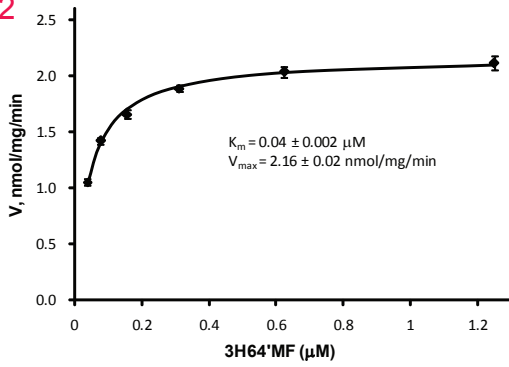

#13

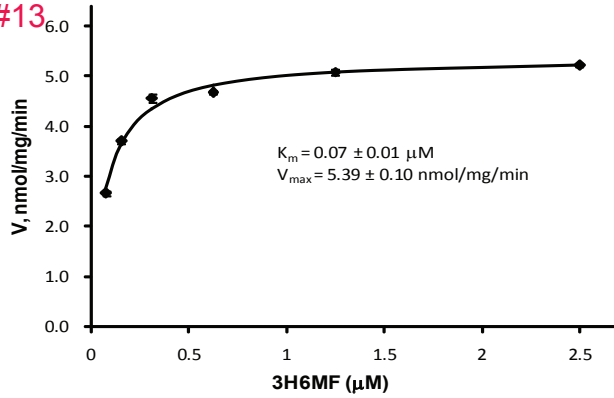

#14

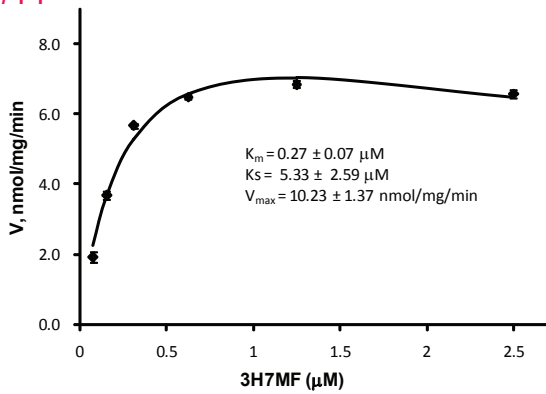

#15

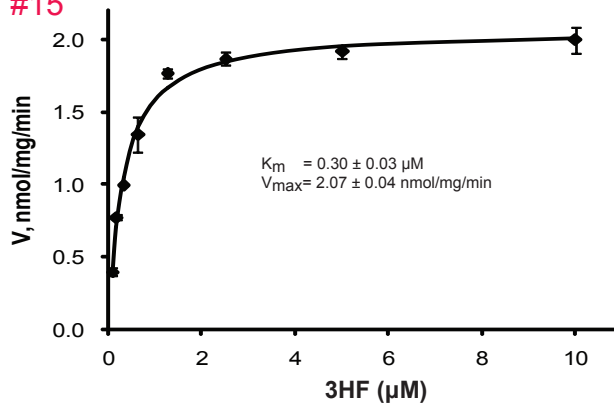

#16

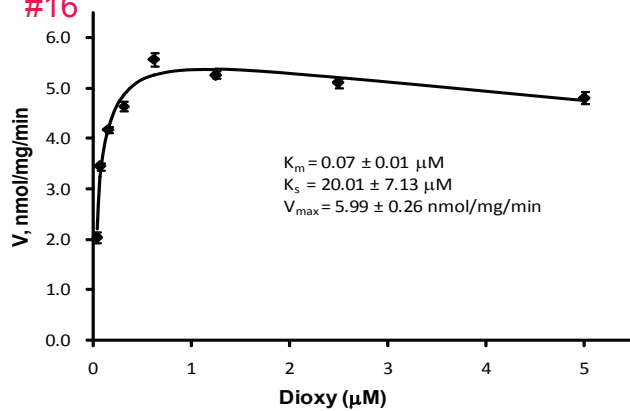

#17

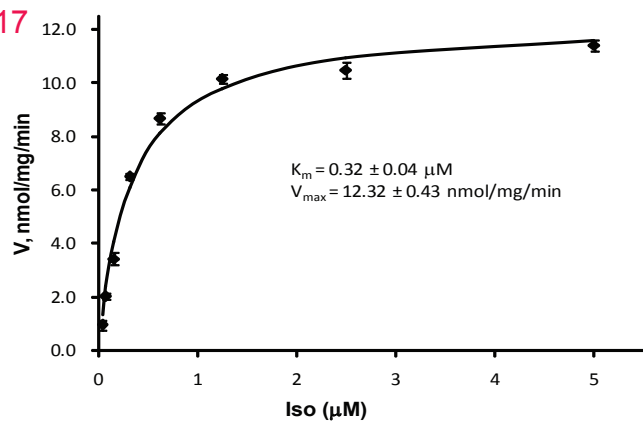

#19

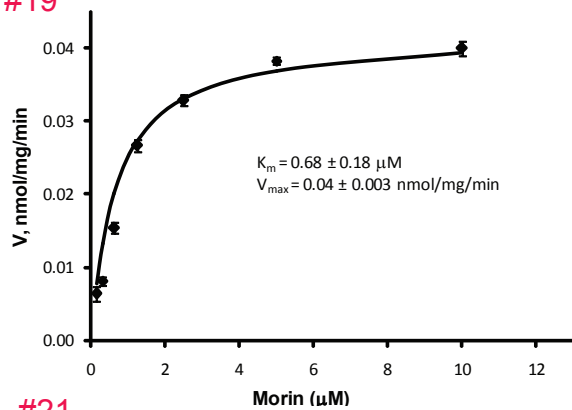

#20

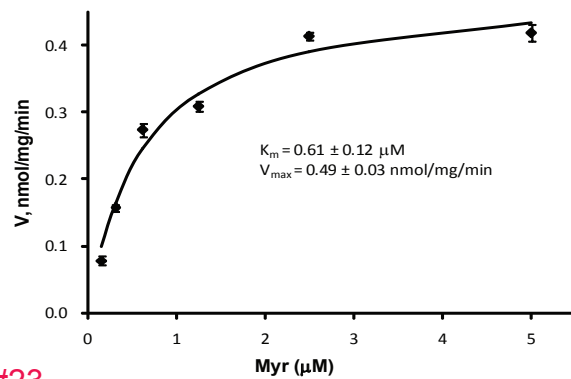

#21

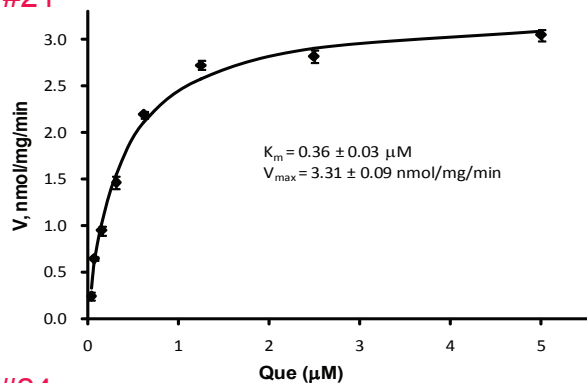

#23

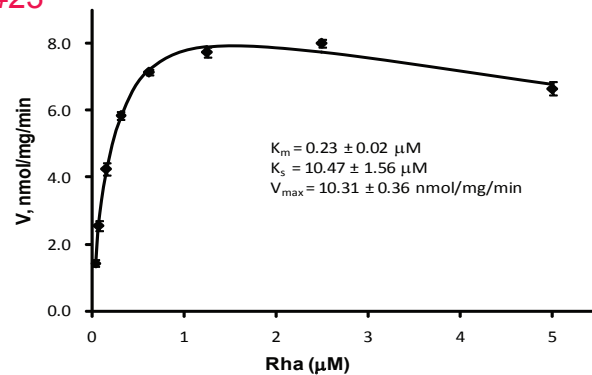

#24

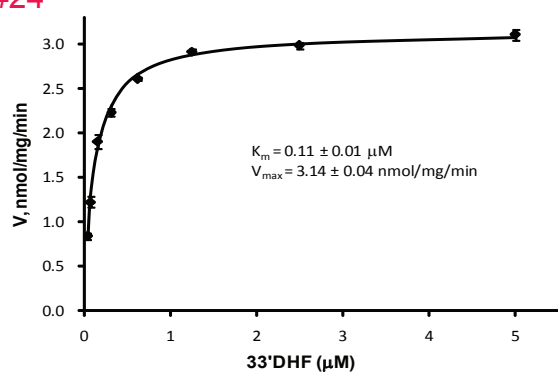

#25

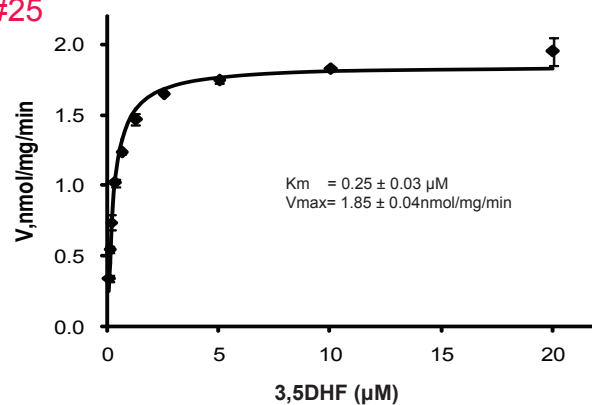

#26

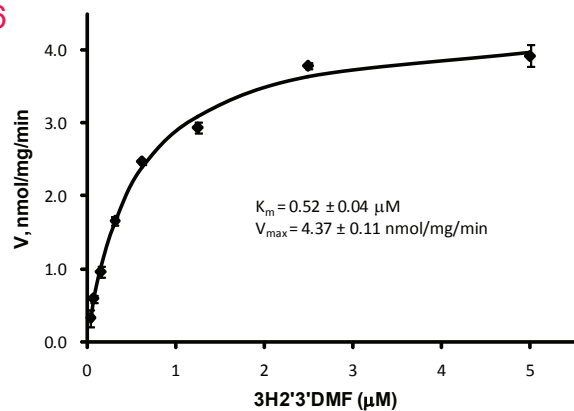

#27

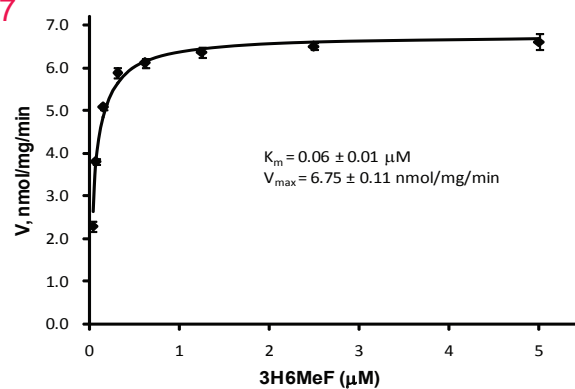

#28

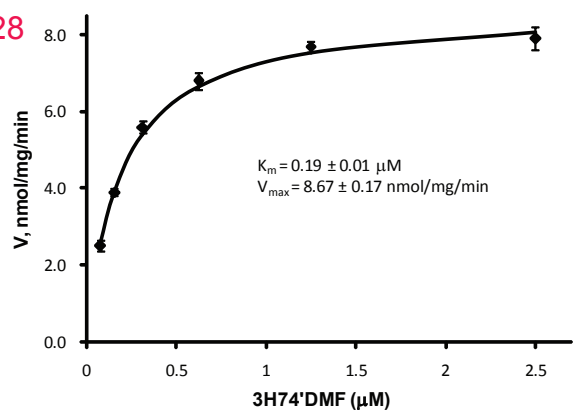

#29

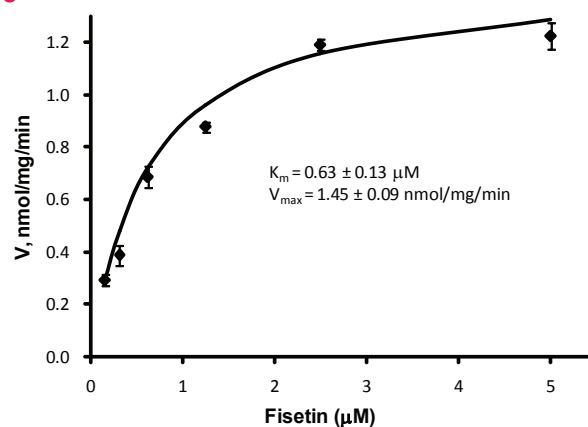

References:

Luukkanen L, Taskinen J, Kurkela M, Kostainen R, Hirvonen J and Finel M (2005) Kinetic characterization of the 1A subfamily of recombinant human UDP-glucuronosyltransferases. *Drug Metab Dispos* 33(7):1017-1026.
